# Supplementary material for: Ayahuasca Mitigates Morphological Cortical Alterations in Juvenile Non-human Primates Following Chronic Stress Exposure
Source: Research Square preprint supplement (doi:10.21203/rs.3.rs-5960718/v1), 2025-03-05
Supplement: Supplementary file 1 [file 364b93469cec90acc8fa00c8.docx]

**Suplementary material**

|  |  |  |  |
| --- | --- | --- | --- |
| AnimaL | CE | Mean per group |  |
| GA1 | 0,027% | 0,027% |  |
| GA2 | 0,027% |  |
| GI1 | 0,030% | 0,029% |  |
| GI2 | 0,028% |  |
| GF1 | 0,024% | 0,025% |  |
| GF2 | 0,027% |  |
| Overall mean | 0,027% |  |  |

Coefficient of Error (CE) calculated for each animal and the group mean in the primary somatosensory cortex (S1).
