# Supplementary figures and images for: Ayahuasca Mitigates Morphological Cortical Alterations in Juvenile Non-human Primates Following Chronic Stress Exposure
Source: Research Square preprint supplement (doi:10.21203/rs.3.rs-5960718/v1), 2025-03-05

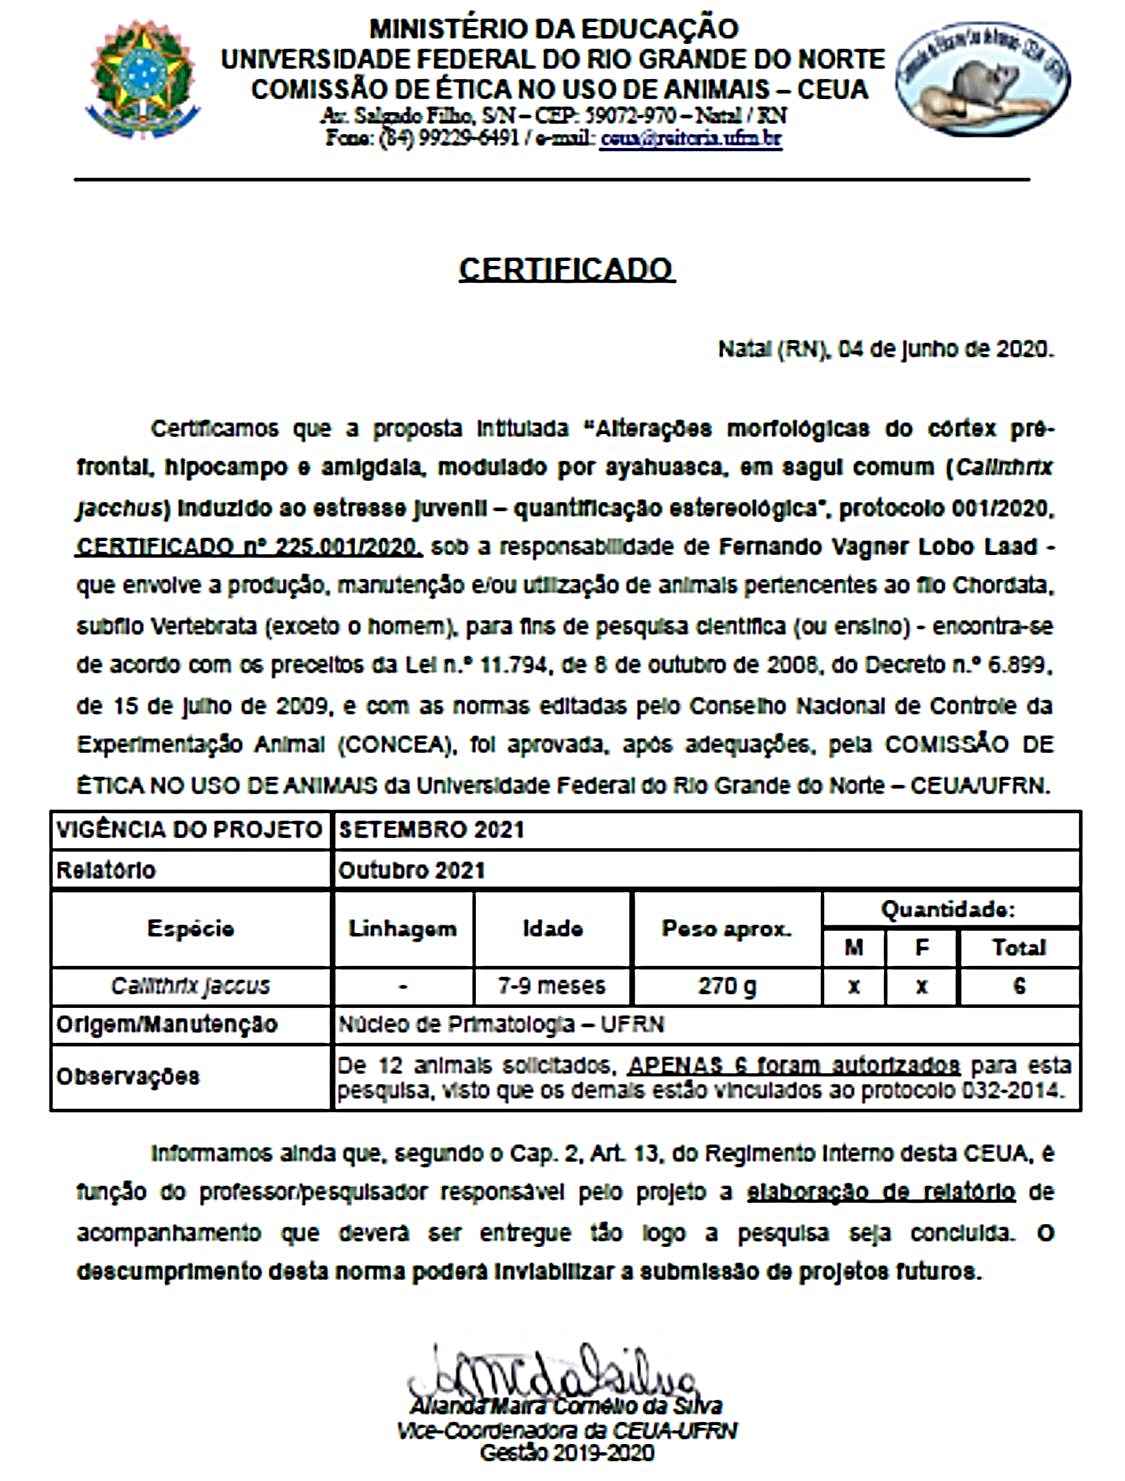

Supplement: Supplementary file 2 [file 77a45eafb21635745ede925d.docx]
